# Supplementary material
Source: Research Square preprint supplement (doi:10.21203/rs.3.rs-8647960/v1)
Supplement: Supplementary file 1 [file 310dfd94e5a626ededef1ce2.pdf]

## Supplementary Material 1

### Flowchart

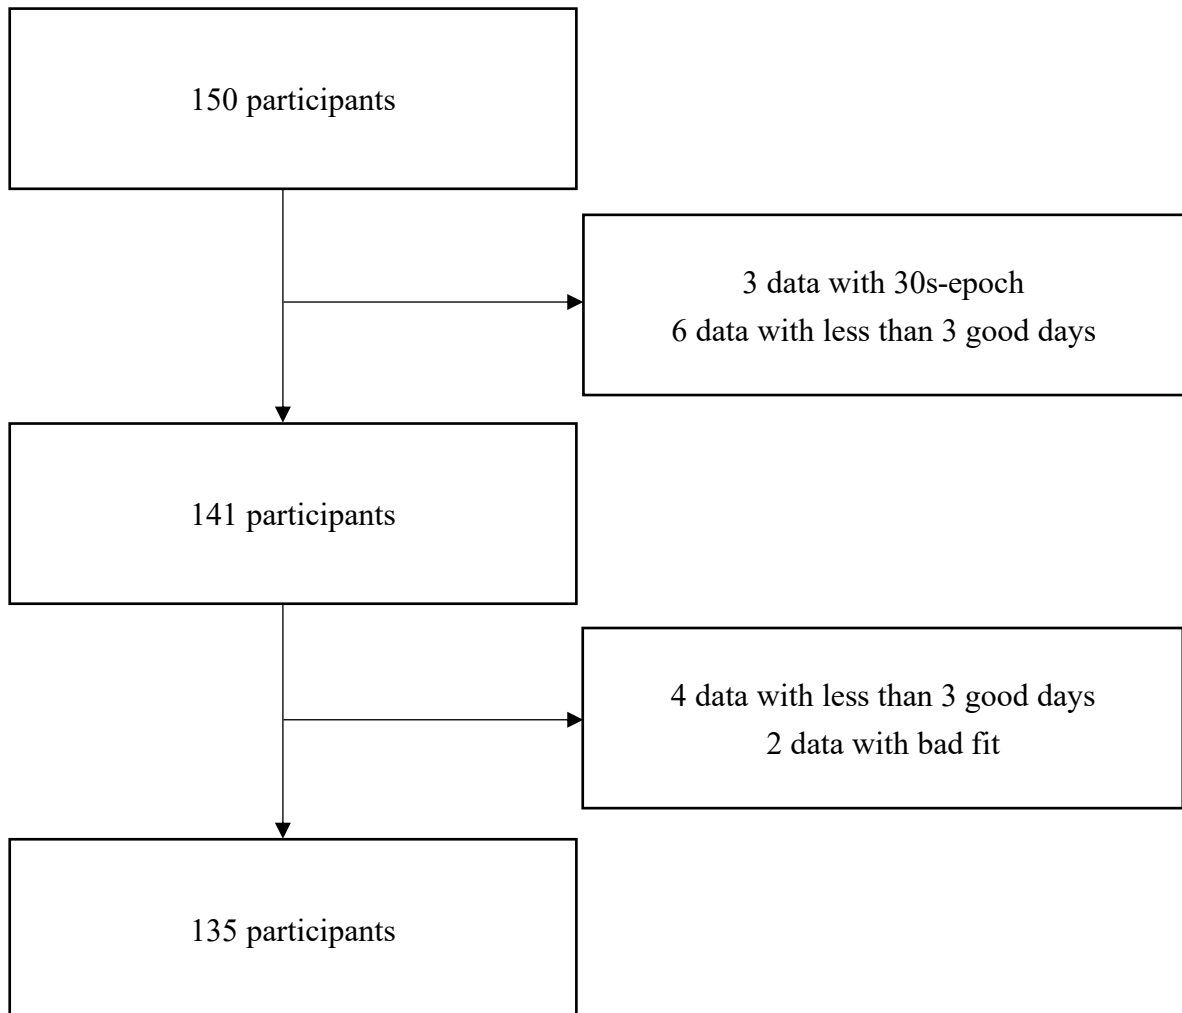

**Supplementary Material 2***Multiple regressions of individual RAR variables on psychological measures*

|                      | B       | SE     | Beta   | t      | p      |
|----------------------|---------|--------|--------|--------|--------|
| <b>PHQ-9</b>         |         |        |        |        |        |
| IS                   | -7.514  | 8.159  | -0.106 | -0.921 | .359   |
| IV                   | -10.551 | 3.419  | -0.273 | -3.086 | .002** |
| RA                   | -1.605  | 8.496  | -0.021 | -0.189 | .850   |
| Up-mesor             | 0.443   | 0.519  | 0.096  | 0.853  | .395   |
| Down-mesor           | 0.202   | 0.692  | 0.035  | 0.292  | .771   |
| Pseudo- $F^{\wedge}$ | -2.513  | 0.982  | -0.237 | -2.560 | .012*  |
| <b>HADS-A</b>        |         |        |        |        |        |
| IS                   | -2.910  | 5.903  | -0.059 | -0.493 | .623   |
| IV                   | -4.301  | 2.474  | -0.161 | -1.738 | .085   |
| RA                   | -2.526  | 6.147  | -0.049 | -0.411 | .682   |
| Up-mesor             | -0.207  | 0.376  | -0.064 | -0.550 | .583   |
| Down-mesor           | 0.292   | 0.501  | 0.072  | 0.582  | .561   |
| Pseudo- $F^{\wedge}$ | -1.235  | 0.710  | -0.169 | -1.739 | .084   |
| <b>ISI</b>           |         |        |        |        |        |
| IS                   | -4.279  | 7.590  | -0.065 | -0.564 | .574   |
| IV                   | -9.895  | 3.181  | -0.275 | -3.111 | .002** |
| RA                   | 1.398   | 7.903  | 0.020  | 0.177  | .860   |
| Up-mesor             | 0.332   | 0.483  | 0.077  | 0.687  | .493   |
| Down-mesor           | 0.714   | 0.644  | 0.131  | 1.109  | .269   |
| Pseudo- $F^{\wedge}$ | -2.420  | 0.913  | -0.245 | -2.651 | .009** |
| <b>MFI-20</b>        |         |        |        |        |        |
| IS                   | -33.137 | 25.851 | -0.163 | -1.282 | .203   |
| IV                   | -26.377 | 10.511 | -0.243 | -2.509 | .014*  |
| RA                   | 16.230  | 26.300 | 0.075  | 0.617  | .538   |
| Up-mesor             | 1.531   | 1.603  | 0.119  | 0.955  | .342   |
| Down-mesor           | -0.501  | 2.129  | -0.031 | -0.235 | .814   |
| Pseudo- $F^{\wedge}$ | -3.981  | 3.033  | -0.132 | -1.313 | .192   |
| <b>SF-6D</b>         |         |        |        |        |        |
| IS                   | 0.054   | 0.174  | 0.035  | 0.308  | .759   |
| IV                   | 0.239   | 0.073  | 0.289  | 3.283  | .001** |
| RA                   | 0.050   | 0.181  | 0.031  | 0.274  | .784   |
| Up-mesor             | -0.004  | 0.011  | -0.038 | -0.337 | .737   |
| Down-mesor           | -0.007  | 0.015  | -0.056 | -0.473 | .637   |
| Pseudo- $F^{\wedge}$ | 0.050   | 0.021  | 0.222  | 2.405  | .018*  |

|                      | log(OR) | SE    | OR    | Wald  | <i>p</i> |
|----------------------|---------|-------|-------|-------|----------|
| MDD diagnosis        |         |       |       |       |          |
| IS                   | -0.613  | 2.258 | 0.542 | 0.074 | .786     |
| IV                   | -3.121  | 1.026 | 0.044 | 9.260 | .002**   |
| RA                   | -1.242  | 2.384 | 0.289 | 0.272 | .602     |
| Up-mesor             | 0.065   | 0.147 | 1.067 | 0.193 | .661     |
| Down-mesor           | 0.109   | 0.199 | 1.115 | 0.300 | .584     |
| Pseudo- $F^{\wedge}$ | -0.774  | 0.296 | 0.461 | 6.842 | .009**   |

*Note.* PHQ-9, Patient Health Questionnaire-9; HADS-A, Hospital Anxiety and Depression Scale – Anxiety subscale; ISI, Insomnia Severity Index; MFI-20, Multidimensional Fatigue Inventory-20; SF-6D, Short-Form Six-Dimensions; MDD, major depressive disorder. All models were controlled for gender and age.

\* $p < .05$ ; \*\*  $p < .01$ ; \*\*\*  $p < .001$

$\wedge$  Scaled down by a factor of 1/1000 to account for small coefficients.

**Supplemental Table 3***BIC indicating the optimal model fit*

|             | EII      | VII      | EEI      | VEI      | EVI      | VVI      | EEE      | VEE      | EVE      | VVE             | EEV      | VEV      | EVV      | VVV      |
|-------------|----------|----------|----------|----------|----------|----------|----------|----------|----------|-----------------|----------|----------|----------|----------|
| # of groups |          |          |          |          |          |          |          |          |          |                 |          |          |          |          |
| 1           | -11652.8 | -11652.8 | -2793.83 | -2793.83 | -2793.83 | -2793.83 | -2674.44 | -2674.44 | -2674.44 | -2674.44        | -2674.44 | -2674.44 | -2674.44 | -2674.44 |
| 2           | -10944.4 | -10870.4 | -2707.72 | -2664.22 | -2654.69 | -2640.22 | -2655.5  | -2601.7  | -2605.23 | <b>-2596.52</b> | -2676.76 | -2650.61 | -2640.42 | -2656    |
| 3           | -10476   | -10593.9 | -2708.75 | -2650.67 | -2686.01 | -2649.88 | -2670.16 | -2619    | -2638.48 | -2631.36        | -2747.62 | -2719.34 | -2710.39 | -2748.17 |
| 4           | -10102.7 | -9899.19 | -2668.3  | -2670.92 | -2707.24 | -2668.25 | -2700.25 | -2639.33 | -2688.66 | -2673.25        | -2790.27 | -2762.46 | -2767.31 | -2792.62 |
| 5           | -9956.05 | -9680.73 | -2690.36 | -2689.59 | NA       | -2712.08 | -2710.43 | -2655.43 | NA       | NA              | -2833.37 | -2840.29 | NA       | NA       |
| 6           | -9649.3  | -9450.21 | -2678.86 | -2683.76 | -2735.13 | -2748.68 | -2707.41 | -2689.15 | NA       | NA              | -2910.47 | -2895.45 | NA       | NA       |
| 7           | -9606.51 | -9215.5  | -2698.73 | -2707.42 | -2776.94 | -2788.25 | -2721.18 | -2725.01 | NA       | NA              | -2961.99 | -2976.87 | NA       | NA       |
| 8           | -9541.65 | -9151.05 | -2717.34 | -2718.74 | -2801.75 | -2830.5  | -2738.76 | -2730.19 | NA       | NA              | -2971.38 | -3022.02 | NA       | NA       |
| 9           | -9520.54 | -9086.35 | -2740.33 | -2738.7  | -2842.09 | -2865.18 | -2763.69 | -2759.28 | NA       | NA              | -3026.62 | -3095.52 | NA       | NA       |

**BOLD** indicates best model as indicated by BIC.

#### Supplementary Material 4

##### *Psychological measures across RAR profiles*

|                     | “later/irregular”<br>( <i>n</i> = 22; 16.3%) | “earlier/robust”<br>( <i>n</i> = 113; 83.7%) | <i>t</i> | <i>df</i> | <i>p</i> | Cohen’s <i>d</i> |
|---------------------|----------------------------------------------|----------------------------------------------|----------|-----------|----------|------------------|
| PHQ-9               | 13.32 (7.74)                                 | 8.90 (8.12)                                  | 2.35     | 133       | .020*    | 0.55             |
| HADS-A              | 9.18 (5.65)                                  | 7.59 (5.66)                                  | 1.20     | 133       | .231     | 0.28             |
| ISI                 | 13.23 (6.66)                                 | 9.28 (7.69)                                  | 2.25     | 133       | .026*    | 0.52             |
| MFI-20 <sup>+</sup> | 48.39 (22.19)                                | 40.03 (22.74)                                | 1.44     | 118       | .152     | 0.37             |
| SF-6D               | 0.687 (0.172)                                | 0.737 (0.176)                                | -1.23    | 133       | .222     | -0.29            |

*Note.* PHQ-9, Patient Health Questionnaire-9; MDD, major depressive disorder; HADS-A, Hospital Anxiety and Depression Scale – Anxiety subscale; ISI, Insomnia Severity Index; MFI-20, Multidimensional Fatigue Inventory-20; SF-6D, Short-Form Six-Dimensions. All models were controlled for gender and age.

\**p* <.05; \*\* *p*<.01; \*\*\* *p*<.001

<sup>+</sup>Sample sizes of “later/irregular” and “earlier/robust” groups were 18 and 102 respectively due to technical issues.
